# Supplementary material for: Surface Diels–Alder adducts on multilayer graphene for the generation of edge-enriched single-atom FeN4 sites for ORR and OER electrocatalysis
Source: Royal Society of Chemistry journal article supplement (doi:10.1039/d2se00004k), 2022-01-01
Supplement: d2se00004k1.pdf [file d2se00004k1.pdf]

## SUPPLEMENTARY INFORMATION

### **Surface Diels-Alder adducts on multilayer graphene for the generation of edge-enriched single-atom FeN<sub>4</sub> sites for ORR and OER electrocatalysis**

Juan Amaro-Gahete,<sup>‡a</sup> José A. Salatti-Dorado,<sup>‡b</sup> Almudena Benítez,<sup>\*c</sup> Dolores Esquivel,<sup>a</sup> Valentín García-Caballero,<sup>b</sup> Miguel López-Haro,<sup>d</sup> Juan J. Delgado,<sup>d</sup> Manuel Cano,<sup>\*b</sup> Juan J. Giner-Casares<sup>b</sup> and Francisco J. Romero-Salguero<sup>\*a</sup>

*a. Departamento Química Orgánica. Instituto de Química Fina y Nanoquímica, Universidad de Córdoba (IUNAN-UCO). Campus Universitario de Rabanales, Carretera N-IV, Ed. Marie Curie, 14071 Córdoba (Spain). E-mail: [qo2rosaf@uco.es](mailto:qo2rosaf@uco.es)*

*b. Departamento Química Física y Termodinámica Aplicada. IUNAN-UCO. Campus Universitario de Rabanales, Carretera N-IV, Ed. Marie Curie, 14071 Córdoba (Spain). E-mail: [q82calum@uco.es](mailto:q82calum@uco.es)*

*c. Departamento Química Inorgánica e Ingeniería Química. IUNAN-UCO. Campus Universitario de Rabanales, Carretera N-IV, Ed. Marie Curie, 14071 Córdoba (Spain). E-mail: [q62betoa@uco.es](mailto:q62betoa@uco.es)*

*d. Departamento de Ciencia de los Materiales e Ingeniería Metalúrgica y Química Inorgánica, Facultad de Ciencias, Universidad de Cádiz, Cádiz (Spain); Instituto de Microscopía Electrónica y Materiales (IMEYMAT), Facultad de Ciencias, Universidad de Cádiz, Cádiz, (Spain).*

*‡ These authors contributed equally to this work.*

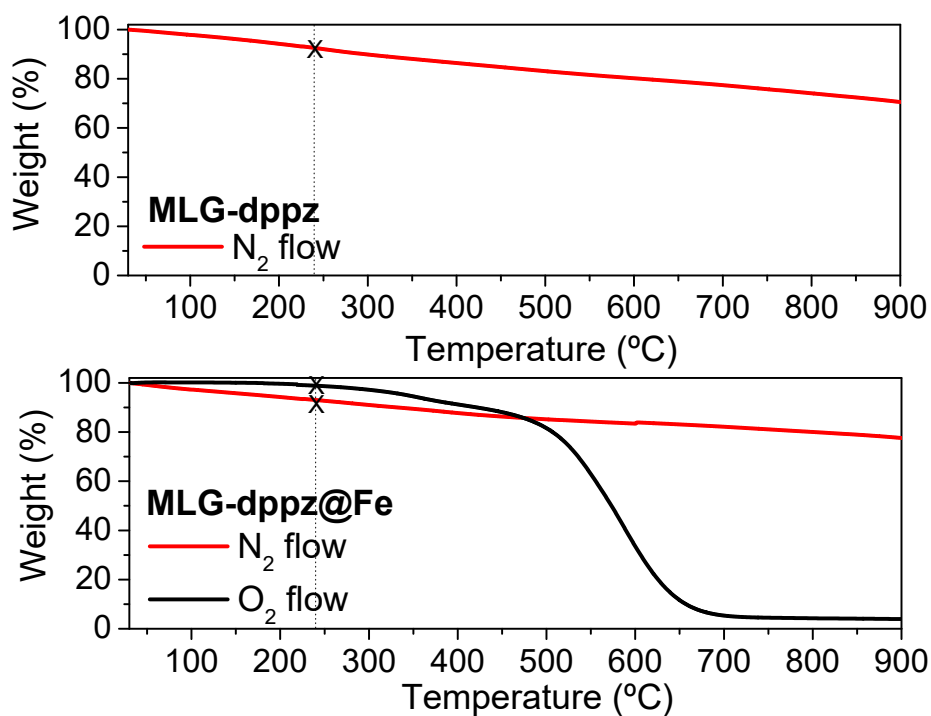

**Fig. S1** TGA curves of MLG-dppz (under a nitrogen atmosphere) and MLG-dppz@Fe (in nitrogen and oxygen atmospheres).

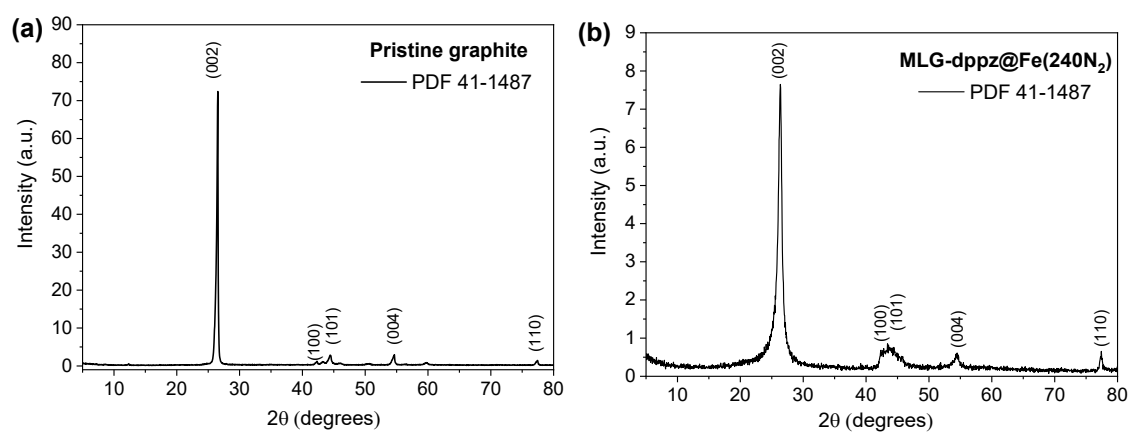

**Fig. S2** XRD patterns of (a) pristine graphite powder and (b) MLG-dppz@Fe(240N<sub>2</sub>) materials.

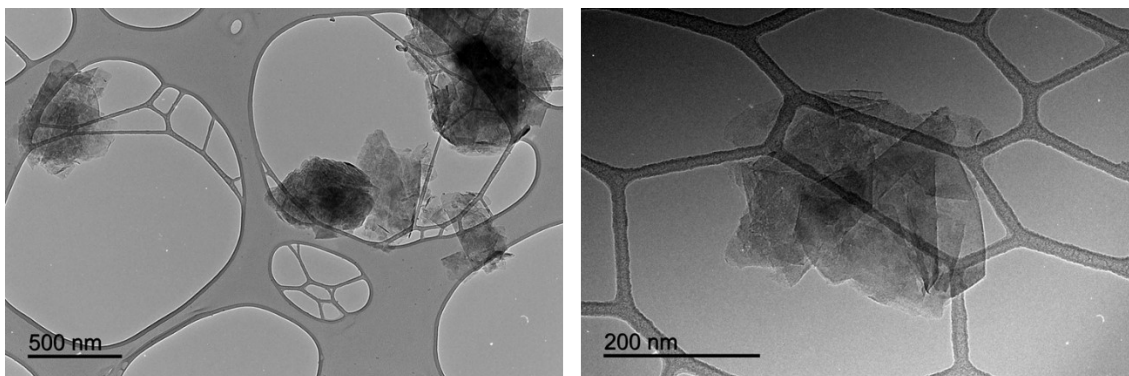

**Fig. S3** TEM images of MLG-dppz@Fe(240N<sub>2</sub>).

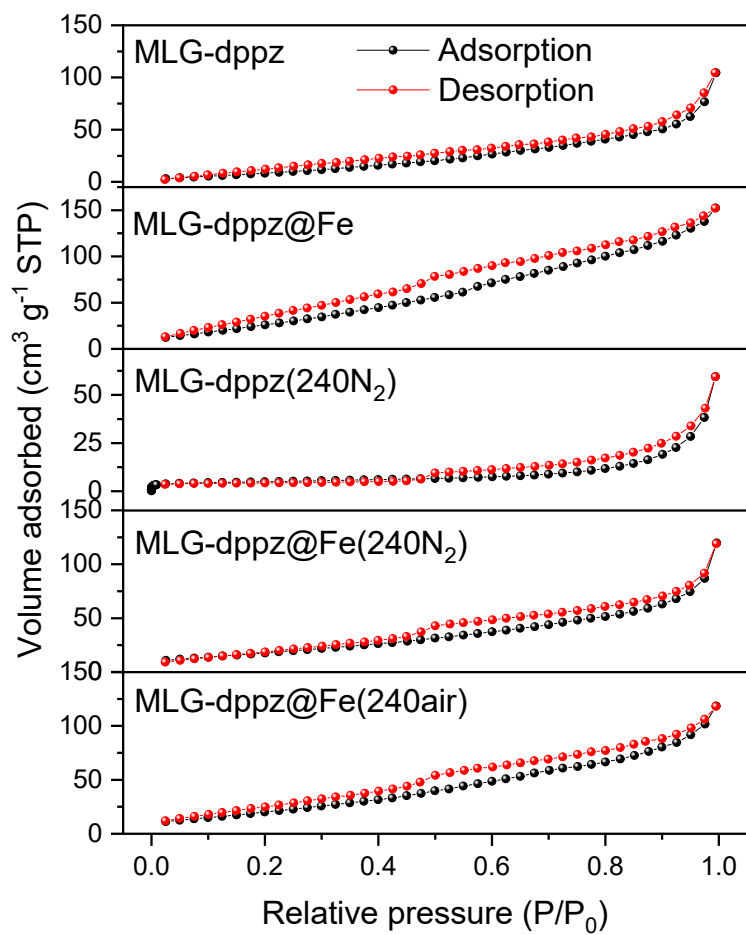

**Fig. S4** N<sub>2</sub> adsorption/desorption isotherms of MLG-dppz materials.

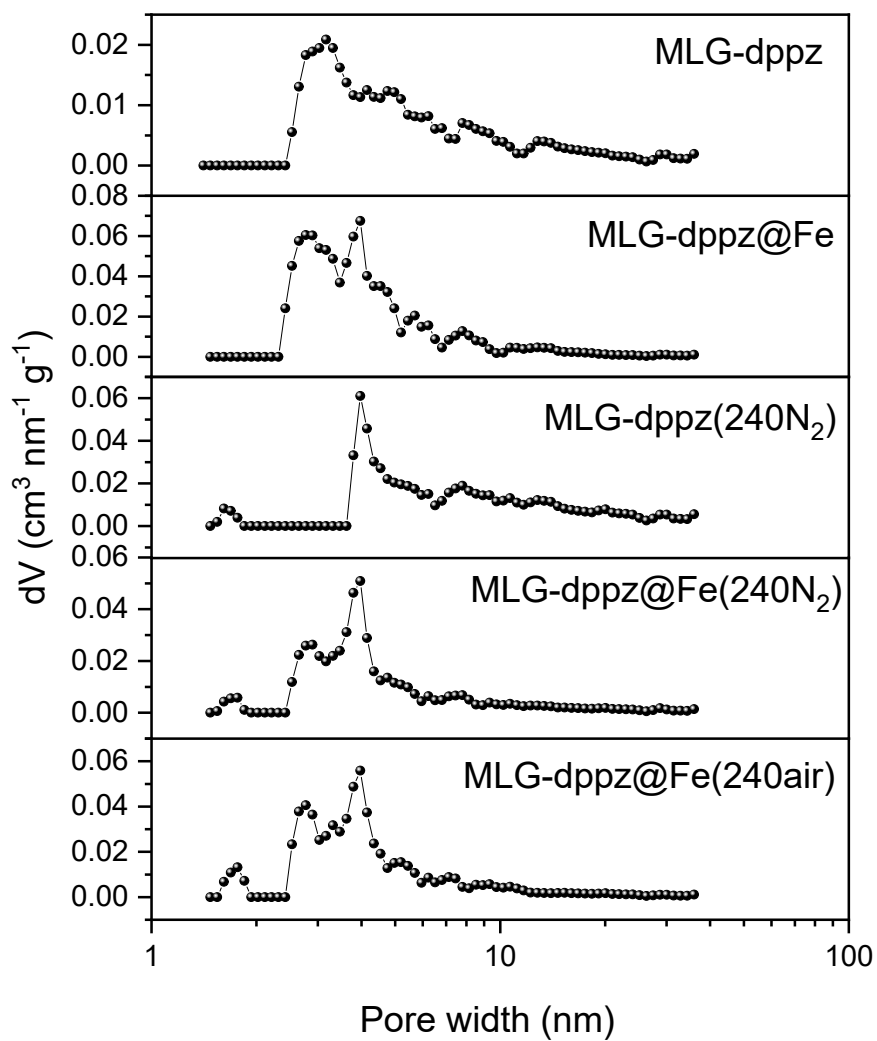

**Fig. S5** Pore size distribution of MLG-dppz materials.

**Table S1** Textural data of MLG-dppz materials.

| Samples                         | $S_{\text{BET}}$ ( $\text{m}^2 \text{g}^{-1}$ ) | $V_{\text{T}}$ ( $\text{cm}^3 \text{g}^{-1}$ ) | $D_{\text{pore}}$ (nm) |
|---------------------------------|-------------------------------------------------|------------------------------------------------|------------------------|
| MLG-dppz                        | 50                                              | 0.161                                          | 13                     |
| MLG-dppz@Fe                     | 128                                             | 0.236                                          | 7                      |
| MLG-dppz(240N <sub>2</sub> )    | 18                                              | 0.092                                          | 21                     |
| MLG-dppz@Fe(240N <sub>2</sub> ) | 74                                              | 0.185                                          | 10                     |
| MLG-dppz@Fe(240air)             | 92                                              | 0.183                                          | 8                      |

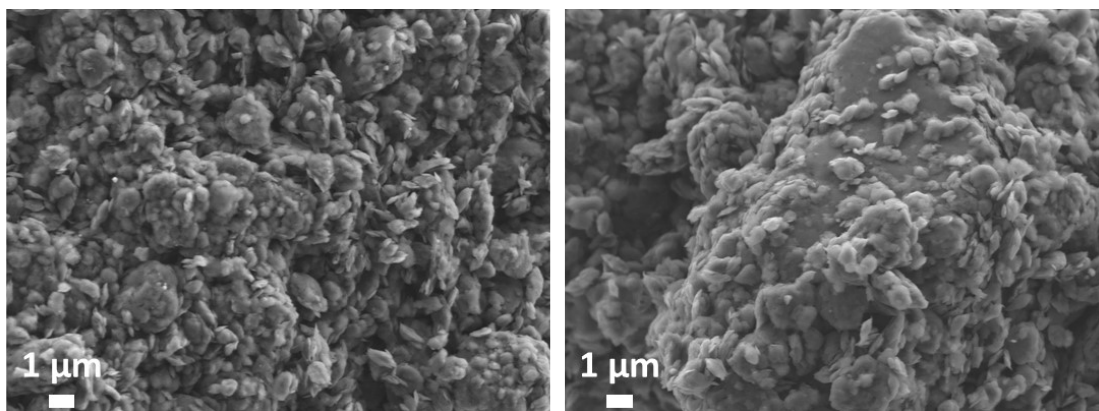

**Fig. S6** SEM representative images of MLG-dppz@Fe(240N<sub>2</sub>).

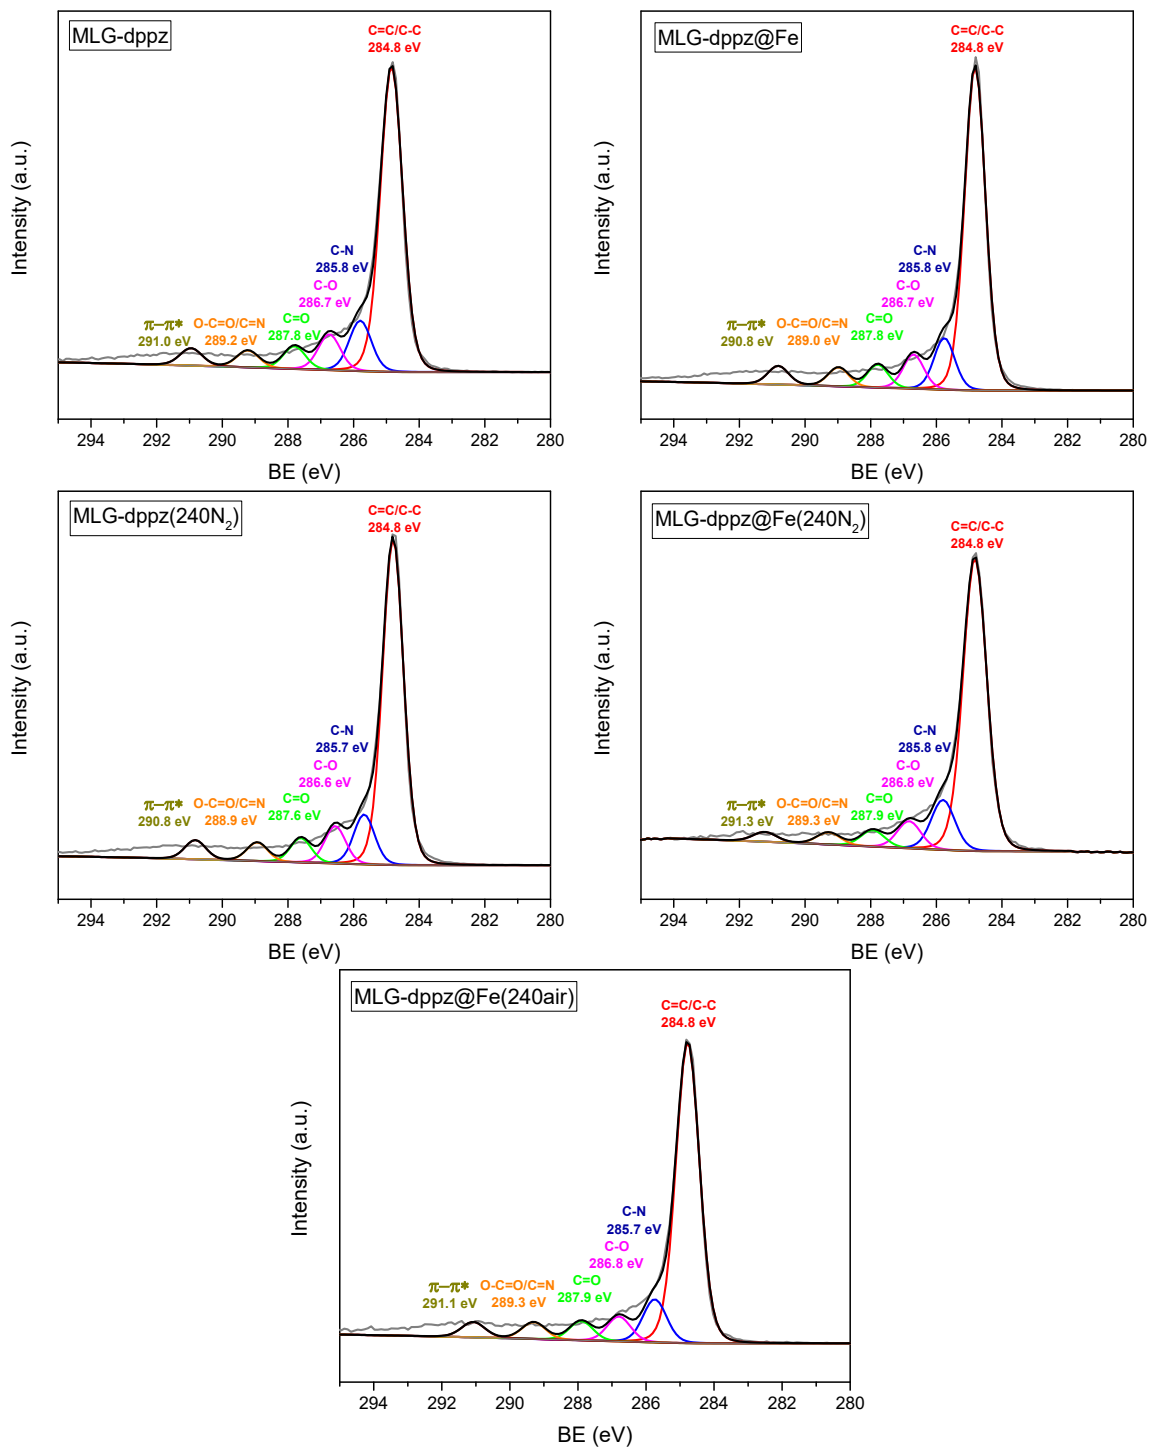

**Fig. S7** XPS spectra for the C1s photoemission peak of MLG-dppz materials.

**Table S2** Contribution of the six components used in the fitting of the C 1s core level signal.

| C1s                   | <i>MLG-dppz</i> |               | <i>MLG-dppz@Fe</i> |               | <i>MLG-dppz(240N<sub>2</sub>)</i> |               | <i>MLG-dppz@Fe(240N<sub>2</sub>)</i> |               | <i>MLG-dppz@Fe(240air)</i> |               |
|-----------------------|-----------------|---------------|--------------------|---------------|-----------------------------------|---------------|--------------------------------------|---------------|----------------------------|---------------|
| <i>Surface groups</i> | <i>BE (eV)</i>  | <i>Atom %</i> | <i>BE (eV)</i>     | <i>Atom %</i> | <i>BE (eV)</i>                    | <i>Atom %</i> | <i>BE (eV)</i>                       | <i>Atom %</i> | <i>BE (eV)</i>             | <i>Atom %</i> |
| C=C/C-C               | 284.8           | 68.1          | 284.8              | 68.9          | 284.8                             | 68.6          | 284.8                                | 71.7          | 284.8                      | 71.6          |
| C-N                   | 285.8           | 11.3          | 285.8              | 11.0          | 285.7                             | 10.5          | 285.8                                | 12.2          | 285.7                      | 10.3          |
| C-O                   | 286.7           | 8.0           | 286.7              | 7.3           | 286.6                             | 7.9           | 286.8                                | 6.7           | 286.8                      | 5.9           |
| C=O                   | 287.8           | 5.1           | 287.8              | 4.9           | 287.6                             | 5.1           | 287.9                                | 4.0           | 287.9                      | 4.6           |
| O-C=O/C=N             | 289.2           | 3.8           | 289.0              | 4.0           | 288.9                             | 3.9           | 289.3                                | 3.0           | 289.3                      | 4.0           |
| $\pi$ - $\pi^*$       | 291.0           | 3.9           | 290.8              | 4.0           | 290.8                             | 4.0           | 291.3                                | 2.4           | 291.1                      | 3.7           |

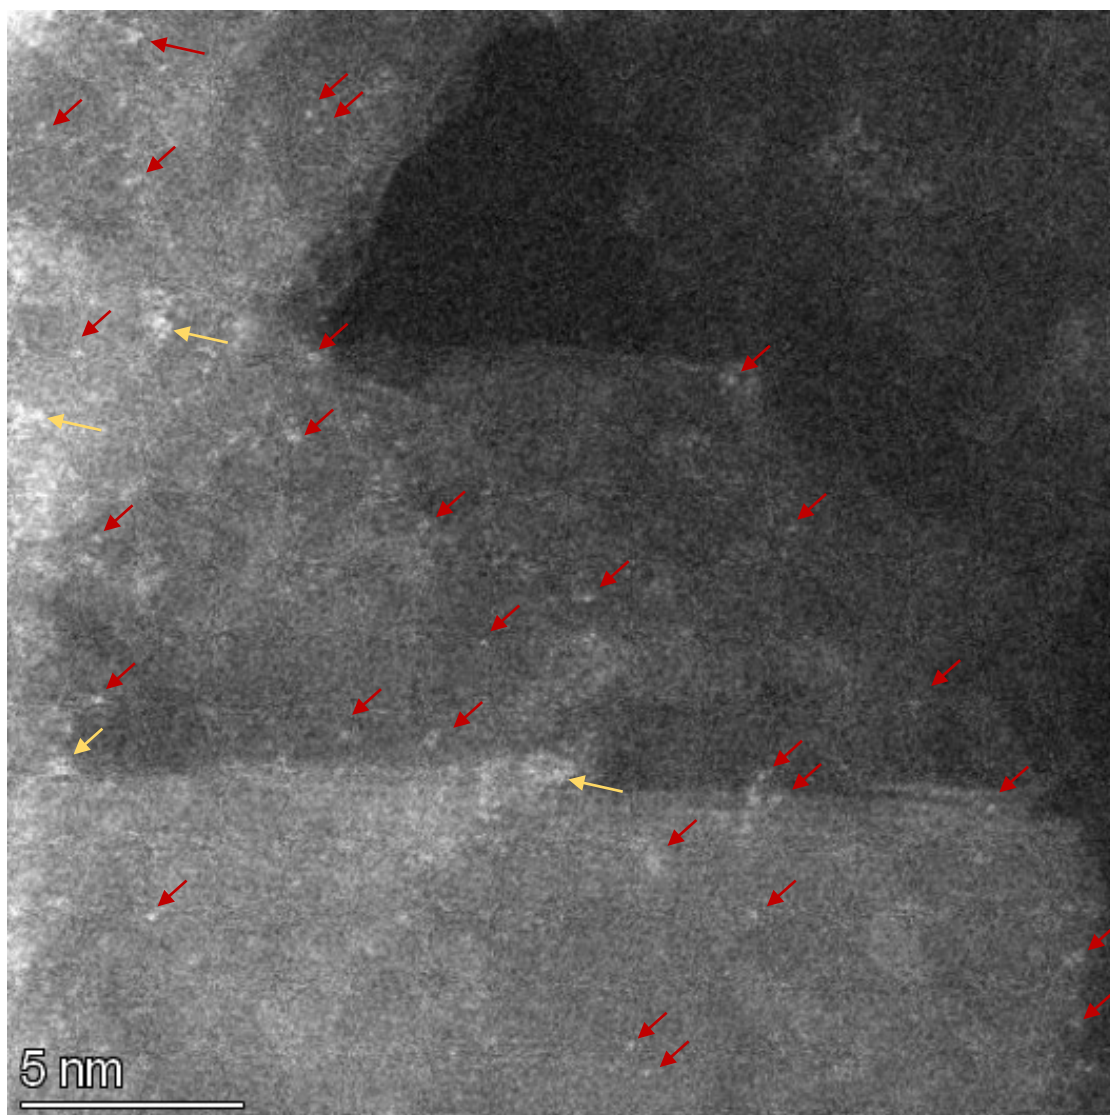

Fig. S8 Aberration corrected HAADF-STEM image of MLG-dppz@Fe(240N<sub>2</sub>) sample (showed in Fig. 4D).

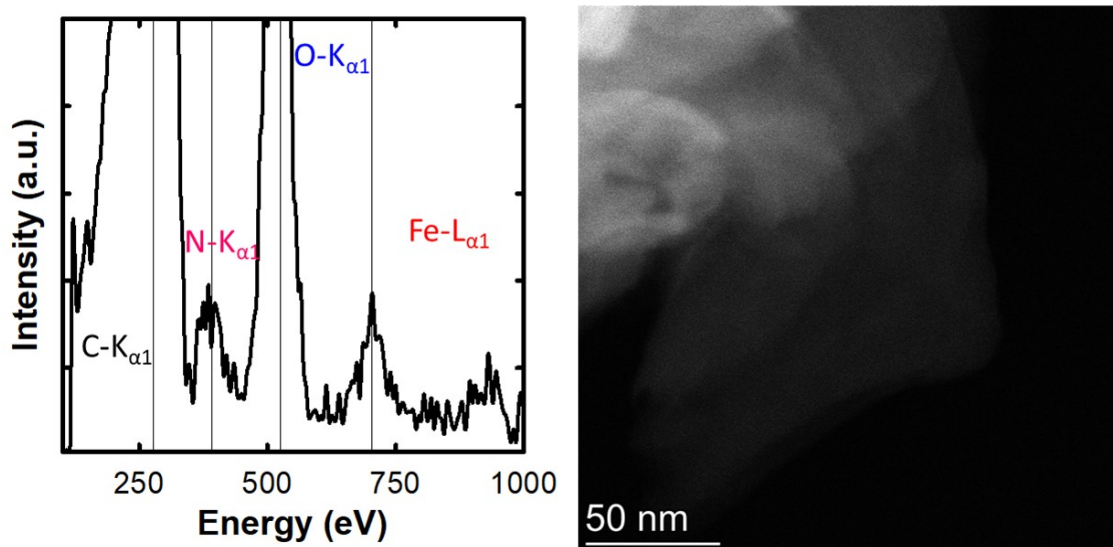

Fig. S9 Sum EDX spectrum of the area included in the HAADF image.



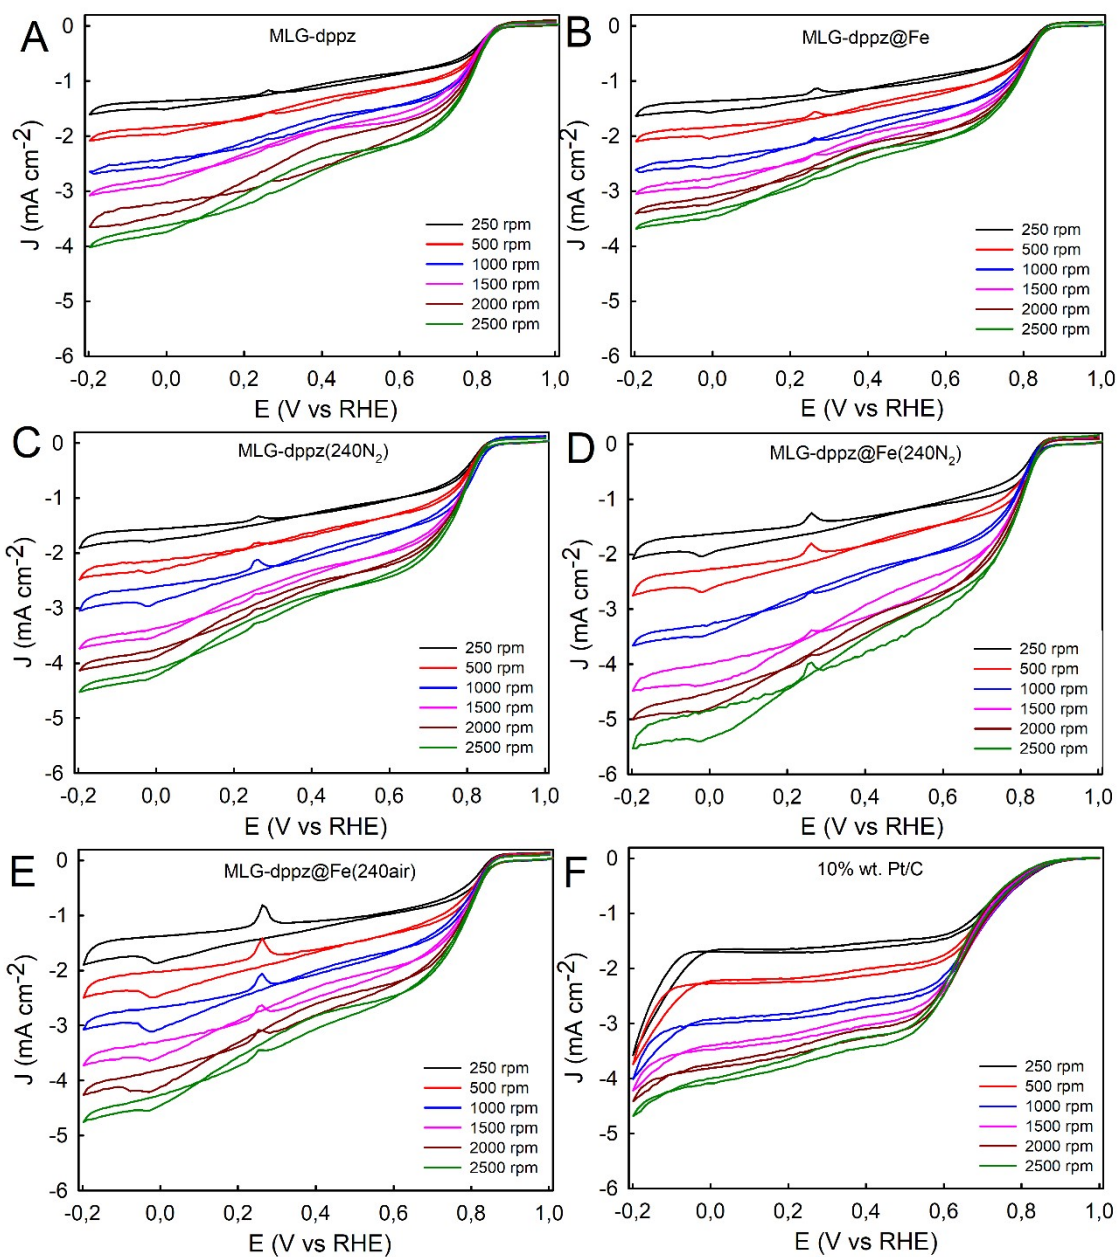

**Fig. S10** Rotating-disk voltammograms at different rotation rates for (A) MLG-dppz, (B) MLG-dppz@Fe, (C) MLG-dppz(240N<sub>2</sub>), (D) MLG-dppz@Fe(240N<sub>2</sub>), (E) MLG-dppz@Fe(240air) and (F) 10 % wt. Pt/C in O<sub>2</sub> saturated 0.5 M KOH at scan rate of 10 mV·s<sup>-1</sup>.

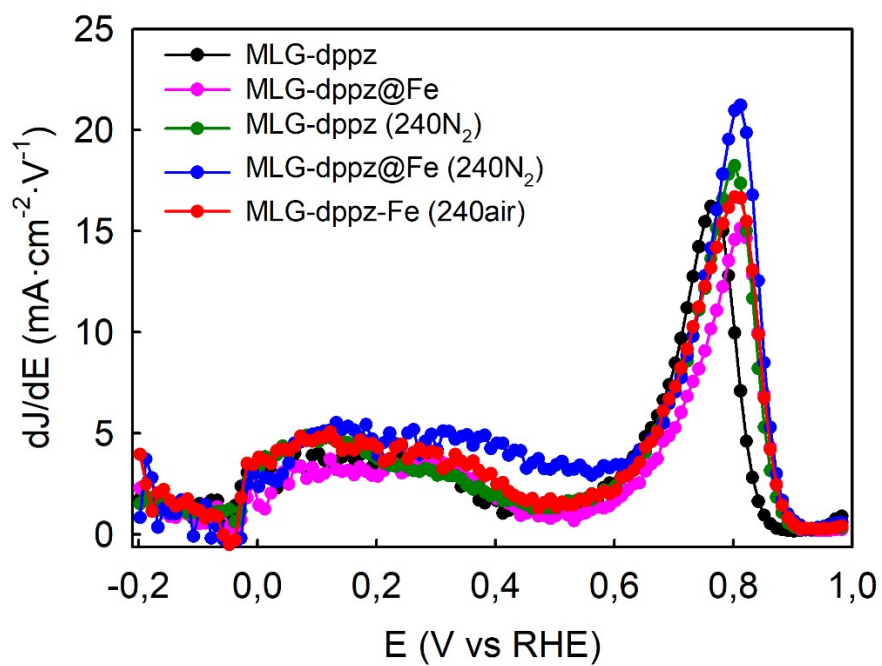

**Fig. S11** Derivatives of the ORR data shown in **Fig. 5C** to obtain the half-wave potentials.

**Table S3** Summary table of ORR electrocatalysts based on NC and Fe-NC materials.

| C/Fe based electrocatalyst              | Fe Wt%      | J (mA·cm <sup>-2</sup> ) and $\omega$ (rpm) | E <sub>onset</sub> (V) | J <sub>k</sub> (mA·cm <sup>-2</sup> ) | n         | Potential (V) | Electrolyte | Reference electrode | Working electrode | Ref.  |
|-----------------------------------------|-------------|---------------------------------------------|------------------------|---------------------------------------|-----------|---------------|-------------|---------------------|-------------------|-------|
| <b>BINOL-CTF-10-500</b>                 | -           | -3.00 and 2400                              | 0.79                   | 9.00                                  | 4.04      | 0.23          | 0.1M KOH    | RHE (SCE)           | GC                | [1]   |
| <b>Fe<sub>2</sub>O<sub>3</sub>-NPCS</b> | 21.00       | -5.80 and 2500                              | 1.06                   | 31.8                                  | 3.85      | 0.90          | 0.1M KOH    | RHE (Ag/AgCl)       | GC                | [2]   |
| <b>CNT/PC</b>                           | 2.90        | -6.00 and 1600                              | 0.95                   | 4.3                                   | 3.98      | 0.90          | 0.1M KOH    | RHE (Ag/AgCl)       | GC                | [3]   |
| <b>Fe-N-CNT@RGO</b>                     | 30.00       | -4.44 and 1600                              | 0.93                   | 1.85                                  | 4.00      | 0.85          | 0.1M KOH    | RHE (SCE)           | GC                | [4]   |
| <b>Co,N-PCL</b>                         | -           | -5.20 and 1600                              | 0.93                   | -                                     | 3.99      | 0.30          | 0.1M KOH    | RHE (Ag/AgCl)       | GC                | [5]   |
| <b>Fe<sub>3</sub>C/NG-800</b>           | 0.81        | -6.40 and 2500                              | 1.03                   | 100                                   | 3.70      | 0.70          | 0.1M KOH    | RHE (SCE)           | GC                | [6]   |
| <b>Fe-N-C-800acid</b>                   | 2.20        | -4.30 and 1600                              | 0.93                   | -                                     | 3.70      | 0.56          | 0.1M KOH    | RHE (Ag/AgCl)       | GC                | [7]   |
| <b>Fe<sub>1.6</sub>-N-HCNS/rGO-900</b>  | 1.60        | -5.70 and 1600                              | 0.7-0.9                | -                                     | 4.02      | 0.70          | 0.1M KOH    | RHE (SCE)           | GC                | [8]   |
| <b>Fe<sub>3</sub>C/C-800</b>            | 15.00       | -5.50 and 2500                              | 1.05                   | -                                     | 3.80-4.00 | 0.99          | 0.1M KOH    | RHE (SCE)           | GC                | [9]   |
| <b>Fe-N-C-800</b>                       | 0.24        | -4.90 and 2025                              | 0.98                   | -                                     | 3.95      | 0.75          | 0.1M KOH    | RHE (Ag/AgCl)       | GC                | [10]  |
| <b>Fe-N-C/rGO</b>                       | 0.15 (atom) | -4.50 and 2025                              | 0.94                   | -                                     | 4.00      | 0.60          | 0.1M KOH    | RHE (Ag/AgCl)       | GC                | [11]  |
| <b>Fe@C-</b>                            | 0.42        | -5.00 and 1600                              | 0.93                   | -                                     | 4.00      | 0.80          | 0.1M KOH    | RHE (SCE)           | GC                | [12]* |

| <b>NG/NCNTs</b>                           |                 |                |      |       |      |      |          |               |    |               |
|-------------------------------------------|-----------------|----------------|------|-------|------|------|----------|---------------|----|---------------|
| <b>C-COP-C-Fe</b>                         | 4.95            | -5.70 and 2025 | 0.89 | 4.00  | 3.93 | 0.75 | 0.1M KOH | RHE (SCE)     | GC | [13]          |
| <b>Fe<sub>3</sub>C-Co/NC</b>              | 1.70            | -5.50 and 1600 | 0.94 | -     | 3.9  | 0.80 | 0.1M KOH | RHE (Ag/AgCl) | GC | [14]*         |
| <b>N-doped<br/>CoCx/FeCo@<br/>C/rGO</b>   | -               | -7.00 and 2500 | 1.02 | -     | 3.84 | 0.46 | 0.1M KOH | RHE (SCE)     | GC | [15]*         |
| <b>M-2</b>                                | -               | -7.90 and 2500 | 0.97 | -     | -    | -    | 0.1M KOH | RHE (Ag/AgCl) | GC | [16]*         |
| <b>FeCo/N-DNC</b>                         | 52.80<br>(atom) | -6.20 and 1600 | 0.89 | -     | 3.92 | 0.2  | 0.1M KOH | RHE (Ag/AgCl) | GC | [17]*         |
| <b>FeS/Fe<sub>3</sub>C@N-S<br/>-C-800</b> | 2.17            | -6.80 and 2500 | 1.02 | -     | 3.9  | 0.2  | 0.1M KOH | RHE (Ag/AgCl) | GC | [18]*         |
| <b>MLG-dppz@Fe<br/>(240N<sub>2</sub>)</b> | 0.73            | -5.50 and 2500 | 0.89 | 86.59 | 3.92 | 1.00 | 0.5M KOH | RHE (Ag/AgCl) | GC | This<br>work* |

\*Materials with bi- or tri-functional character.

**Table S4** Summary table of OER electrocatalysts based on NC and Fe-NC materials.

| C/Fe based catalyst                                               | Fe Wt%       | $\eta_{10}$ (mV) | Tafel Slope (mV/dec) | Electrolyte | Reference electrode | Working electrode | Ref.       |
|-------------------------------------------------------------------|--------------|------------------|----------------------|-------------|---------------------|-------------------|------------|
| <b>Fe/Fe<sub>3</sub>C-MC</b>                                      | 2.40         | 320              | 51.0                 | 1M KOH      | RHE                 | GC                | [19]*      |
| <b>Fe@C-NG/NCNTs</b>                                              | 0.42         | 450              | 163.0                | 1M KOH      | RHE (SCE)           | GC                | [12]*      |
| <b>Fe<sub>3</sub>C-Co/NC</b>                                      | 1.70         | 340              | 108.8                | 1M KOH      | RHE (Ag/AgCl)       | GC                | [14]*      |
| <b>Fe<sub>3</sub>O<sub>4</sub>/NiS@CC</b>                         | 1.18         | 310              | 82.0                 | 1M KOH      | RHE (Ag/AgCl)       | GC                | [20]       |
| <b>N-doped CoCx/FeCo@C/rGO</b>                                    | -            | 390              | 77.1                 | 0.1M KOH    | RHE (SCE)           | GC                | [15]*      |
| <b>PNG-NiCo</b>                                                   | -            | 564              | 156.0                | 0.1M KOH    | RHE (Ag/AgCl)       | Hybrid films      | [21]       |
| <b>M-2</b>                                                        | -            | 710              | 54.0                 | 0.1M KOH    | RHE (Ag/AgCl)       | GC                | [16]*      |
| <b>N-doped SWNT</b>                                               | -            | 430              | -                    | 0.1M KOH    | RHE                 | GC                | [22]       |
| <b>FeCo/N-DNC</b>                                                 | 52.80 (atom) | 390              | 68.0                 | 0.1M KOH    | RHE (Ag/AgCl)       | GC                | [17]*      |
| <b>FeS/Fe<sub>3</sub>C@N-S-C-800</b>                              | 2.17         | 570              | 81.0                 | 1M KOH      | RHE (Ag/AgCl)       | GC                | [18]*      |
| <b>Fe<sub>3</sub>C@C-N</b>                                        | 3.50         | 608              | 89.0                 | 0.1M KOH    | RHE (SCE)           | GC                | [23]       |
| <b>Ni<sub>1.95</sub>Fe-MOP@CNTs</b>                               | 2.69         | 256              | 58.0                 | 1M KOH      | RHE (Ag/AgCl)       | GC                | [24]       |
| <b>Co<sub>3</sub>O<sub>4</sub>/N-C</b>                            | -            | 390              | 44.0                 | 1M KOH      | RHE (Ag/AgCl)       | GC                | [25]       |
| <b>Fe/C-doped-MoS<sub>2</sub>/Ni<sub>3</sub>S<sub>2</sub>-450</b> | -            | 273              | 66.0                 | 1M KOH      | RHE (SCE)           | GC                | [26]       |
| <b>MLG-dppz@Fe (240N<sub>2</sub>)</b>                             | 0.73         | 500              | 100.5                | 0.5M KOH    | RHE (Ag/AgCl)       | GC                | This work* |

\*Materials with bi- or tri-functional character.

## References

1. H. S. Jena, C. Krishnaraj, S. Parwaiz, F. Lecoivre, J. Schmidt, D. Pradhan, and P. Van Der Voort, *ACS Applied Materials & Interfaces*, 2020, **12**, 44689-44699.
2. X. Cheng, P. Yan, S. Liu, M. Qian, B. Wang, Z. Wan, J. Tian, S. Xing-Can, T. Taylor Isimjan, X. Yang, *Int. J. Hydrog. Energy*, 2019, **44**, 12127-12137.
3. Y. Jin Sa, D.J. Seo, J. Woo, J. Tae Lim, J. Yeong Cheon, S. Yong Yang, J. Myeong Lee, D. Kang, T. Joo Shin, H. Suk Shin, H. Young Jeong, C. Sung Kim, M. Gyu Kim, T.Y. Kim, S. Hoon Joo, *J. Am. Chem. Soc.*, 2016, **138**, 15046-15056.
4. Y. Zheng, F. He, J. Wu, D. Ma, H. Fan, S. Zhu, X. Li, Y. Lu, Q. Liu, X. Hu, *ACS Applied Nano Materials*, 2019, **2**, 3538-3547.
5. H. Park, S. Oh, S. Lee, S. Choi, M. Oh, *Appl. Catal. B Environ.*, 2019, **246**, 322-329.
6. M. Xiao, J. Zhu, L. Feng, C. Liu, y W. Xing, *Adv. Mater.*, 2015, **27**, 2521-2527.
7. C. Li, C. He, F. Sun, M. Wang, J. Wang, Y. Lin, *ACS Applied Nano Materials*, 2018, **1**, 1801-1810.
8. H. Tan, J. Tang, J. Henzie, Y. Li, X. Xu, T. Chen, Z. Wang, J. Wang, Y. Ide, Y. Bando, Y. Yamauchi, *ACS Nano*, 2018, **12**, 5674-5683.
9. M.Sc. Yang Hu, J. Oluf Jensen, W. Zhang, L. N. Cleemann, W. Xing, N. J. Bjerrum, Q. Li, *Angew. Chem. Int. Ed.*, 2014, **53**, 3675-3679.
10. W. Niu, L. Li, X. Liu, N. Wang, J. Liu, W. Zhou, Z. Tang, S. Chen, *J. Am. Chem. Soc.*, 2015, **137**, 5555-5562.
11. C. Zhang, J. Liu, Y. Ye, Z. Aslam, R. Brydson, C. Liang, *ACS Appl. Mater. Interfaces*, 2018, **10**, 2423-2429.
12. Q. Wang, Y. Lei, Z. Chen, N. Wu, Y. Wang, B. Wang, Y. Wang, *J. Mater. Chem. A*, 2018, **6**, 516-526.
13. Z. Xiang, Y. Xue, D. Cao, L. Huang, J.-F. Chen, L. Dai, *Angew. Chem. Int. Ed.*, 2014, **53**, 2433-2437.
14. C. C. Yang, S. F. Zai, Y. T. Zhou, L. Du, Q. Jiang, *Adv. Funct. Mater.*, 2019, **29**, 1901949-1901961.
15. H. Fang, T. Huang, Y. Sun, B. Kang, D. Liang, S. Yao, J. Yu, M. Mayilvel Dinesh, S. Wu, J. Yong Lee, *J. Catal.*, 2019, **371**, 185-195.
16. J. Ding, P. Wang, S. Ji, H. Wang, V. Linkov, R. Wang, *Electrochimica Acta*, 2019, **296**, 653-661.
17. G. Fu, Y. Liu, Y. Chen, Y. Tang, J. B. Goodenough, J.-M. Lee, *Nanoscale*, 2018, **10**, 19937-19944.
18. F. Kong, X. Fan, A. Kong, Z. Zhou, X. Zhang, Y. Shan, *Adv. Funct. Mater.*, 2018, **28**, 1803973-1803987.
19. X. Liang, J. Xiao, W. Weng, W. Xiao, *Angew. Chem. Int. Ed.*, 2021, **60**, 2120-2124.
20. S. Jiang, H. Shao, G. Cao, H. Li, W. Xu, J. Li, J. Fang, X. Wang, *J. Mater. Sci. Technol.*, 2020, **59**, 92-99.

21. S. Chen, S.-Z. Qiao, *ACS Nano*, 2013, **7**, 10190-10196.
22. G. Murdachaew, K. Laasonen, *J. Phys. Chem. C*, 2018, **122**, 25882-25892.
23. S. Asad Abbas, A. Ma, D. Seo, H. Jung, Y. Ji Lim, A. Mehmood, K. Min Nam, *Appl. Surf. Sci.*, 2021, **551**, 149445-149454.
24. D. Song, L. Wang, M. Yao, W. Sun, R. Vajtai, P. M. Ajayan, Y. Wang, *Adv. Sustainable Syst.*, 2020, **4**, 2000227-2000235.
25. S. Farid, W. Qiu, J. Zhao, D. Wu, X. Song, S. Ren, C. Hao, *Electrocatalysis*, 2020, **11**, 46-58.
26. X. Lv, G. Liu, S. Liu, W. Chen, D. Cao, T. Song, N. Wang, Y. Zhu, *Crystals*, 2021, **11**, 340-352.
